# Supplementary material for: Silver doped reduced graphene oxide as a promising plasmonic photocatalyst for oxidative coupling of benzylamines under visible light irradiation
Source: Royal Society of Chemistry journal article supplement (doi:10.1039/c9nj00852g), 2019-01-01
Supplement: c9nj00852g1.pdf [file c9nj00852g1.pdf]

## Supporting Information

### Silver doped reduced graphene oxide as promising plasmonic photocatalyst for oxidative coupling of benzylamines under visible light irradiation

Anurag Kumar,<sup>1,2</sup> Aathira M. S.,<sup>1</sup> and Suman L. Jain<sup>1\*</sup>

<sup>1</sup>Chemical & Material Sciences Division, CSIR-Indian Institute of Petroleum, Dehradun India  
248005

<sup>2</sup>Academy of Scientific and Innovative Research (AcSIR), New Delhi India 110001

#### Calculation: -

The identification of product was done by gas chromatography-mass spectrometry (GC-MS). (Fig. S1) The conversion of benzylamine, yield and selectivity of imine were analysed based on the following equations:

$$\text{Conversion (\%)} = [(C_0 - C_{\text{benzylamine}})/C_0] \times 100$$

$$\text{Yield (\%)} = C_{\text{imine}}/C_0 \times 100$$

$$\text{Selectivity (\%)} = [C_{\text{imine}}/(C_0 - C_{\text{benzylamine}})] \times 100$$

Where  $C_0$  is the whole quantity of benzylamine in the reaction mixture before irradiation;  $C_{\text{benzylamine}}$  is the amount of benzylamine in the solution after irradiation for 12 h;  $C_{\text{imine}}$  is the amount of imine in the solution after irradiation for 12 h.

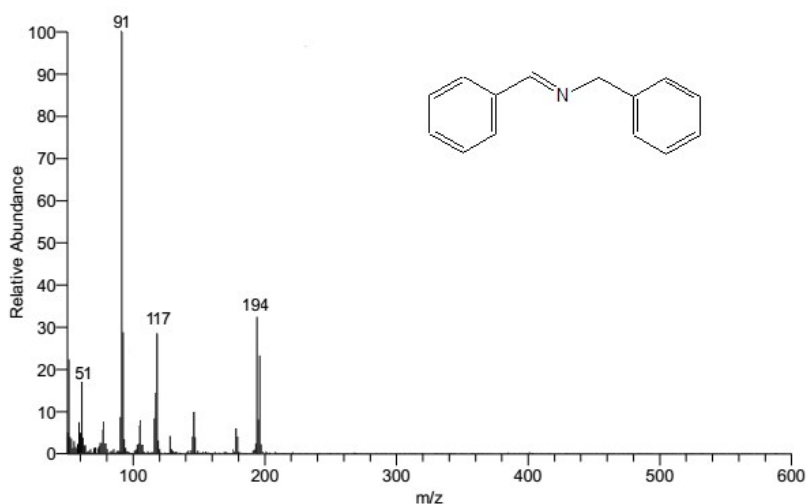

**Fig. S13:** GC-MS of the product obtained from oxidative coupling of benzylamine using Ag@rGO photocatalyst after 12 h irradiation time.

**Table S1:** A comparison of the Ag@rGO with literature known photocatalyst for the oxidation of benzylamine

| Entry | Photocatalyst                                           | T [°C] | Oxidant        | Product Yield [%] <sup>a</sup> or [ $\mu\text{mol g}^{-1} \text{h}^{-1}$ ] <sup>b</sup> | Ref. No.  |
|-------|---------------------------------------------------------|--------|----------------|-----------------------------------------------------------------------------------------|-----------|
| 1     | Ag@rGO                                                  | RT     | O <sub>2</sub> | 97 <sup>a</sup>                                                                         | This work |
| 2     | Cu <sub>2</sub> O/CQD                                   | RT     | O <sub>2</sub> | 95 <sup>a</sup>                                                                         | [1]       |
| 3     | Au/TiO <sub>2</sub>                                     | RT     | Air            | 883 <sup>b</sup>                                                                        | [2]       |
| 4     | Au-Pd/ZrO <sub>2</sub>                                  | 45 °C  | O <sub>2</sub> | 198 <sup>b</sup>                                                                        | [3]       |
| 5     | Fe(bpy) <sub>3</sub> /npg-C <sub>3</sub> N <sub>4</sub> | RT     | O <sub>2</sub> | 94 <sup>a</sup>                                                                         | [4]       |
| 6     | BiVO <sub>4</sub> /g-C <sub>3</sub> N <sub>4</sub>      | RT     | O <sub>2</sub> | 1089 <sup>b</sup>                                                                       | [5]       |
| 7     | WS <sub>2</sub>                                         | 50 °C  | O <sub>2</sub> | 94 <sup>a</sup>                                                                         | [6]       |
| 8     | WO <sub>3</sub>                                         | RT     | O <sub>2</sub> | 950 <sup>b</sup>                                                                        | [7]       |

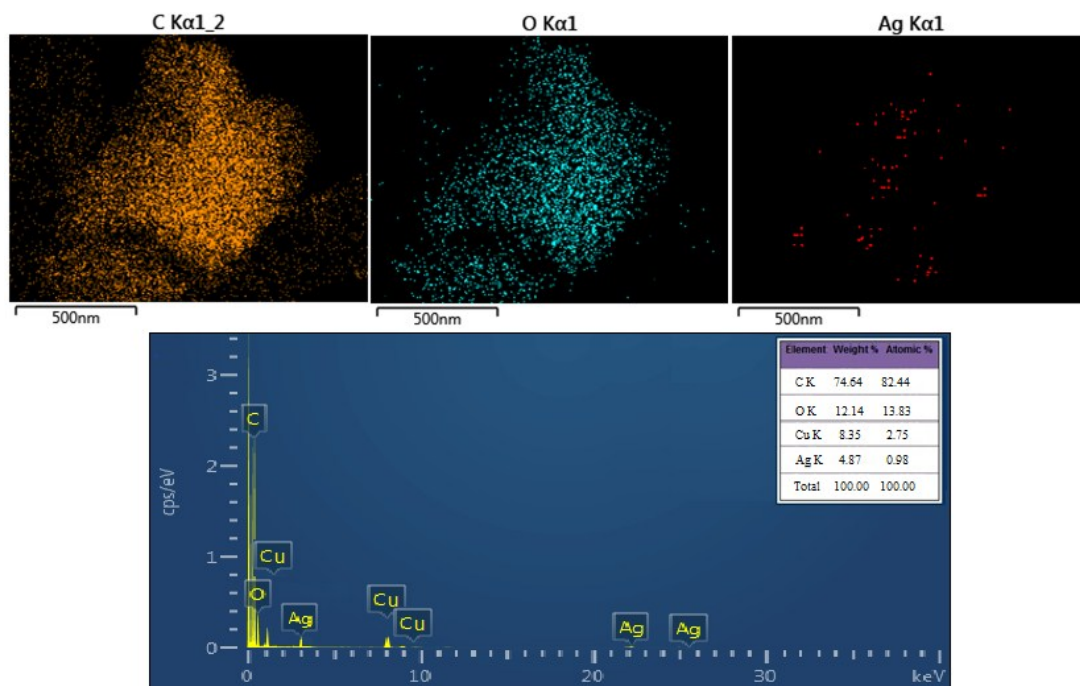

Fig. S2: EDX Pattern of Ag@rGO showing elemental composition

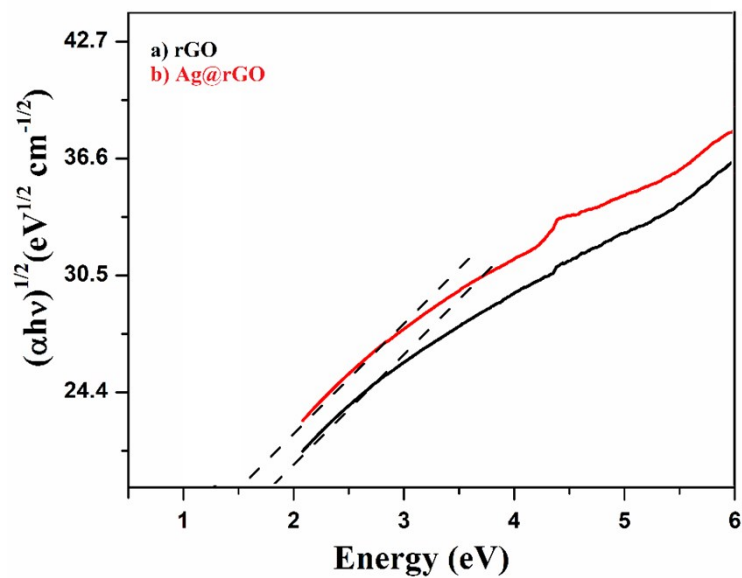

Fig. S3: Tauc plot for band gap determination of a) rGO, b) Ag@rGO.

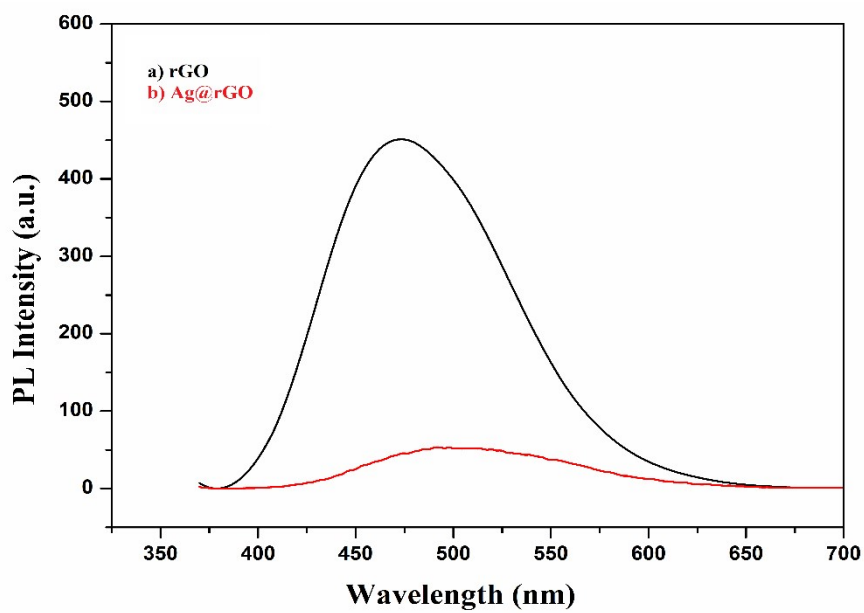

Fig. S4: PL spectra of a) rGO, b) Ag@ rGO photocatalyst.

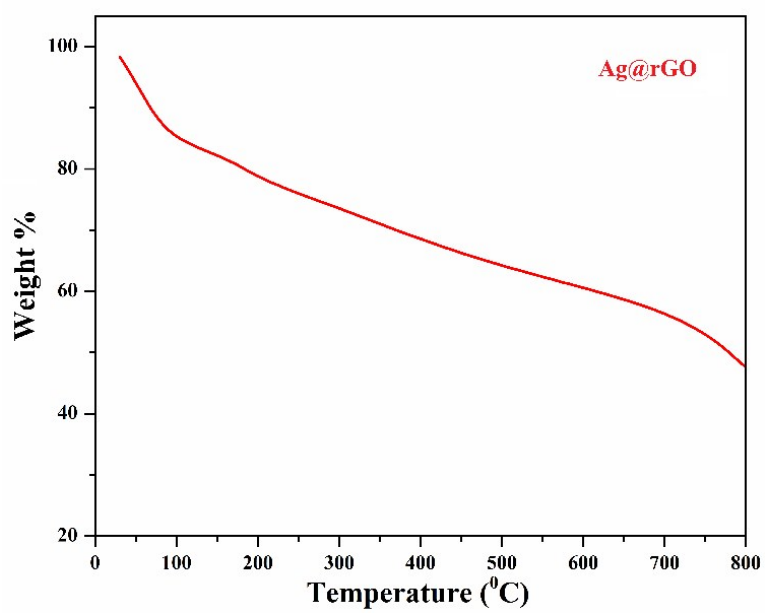

Fig. S5: TGA diagram of Ag@rGO.

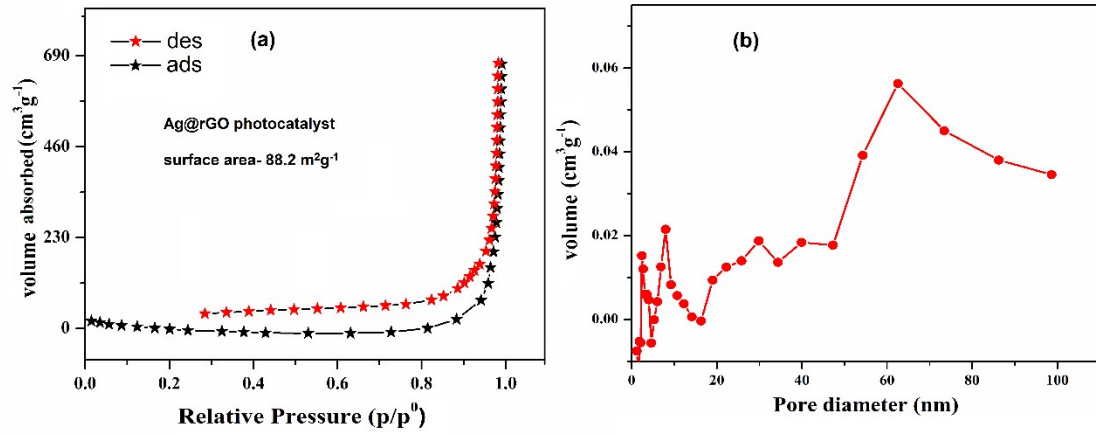

**Fig. S6:**  $N_2$  adsorption-desorption isotherms; b) BJH pore size distribution curves of Ag@rGO.

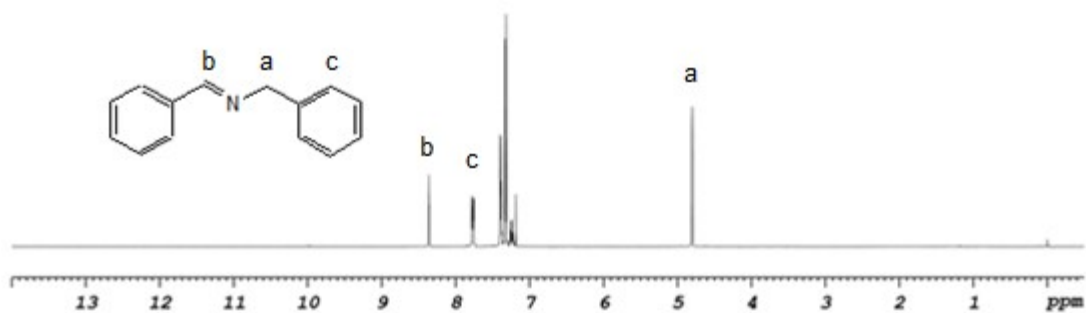

**Fig. S7:** <sup>1</sup>H NMR of N-benzylidenebenzylamine.

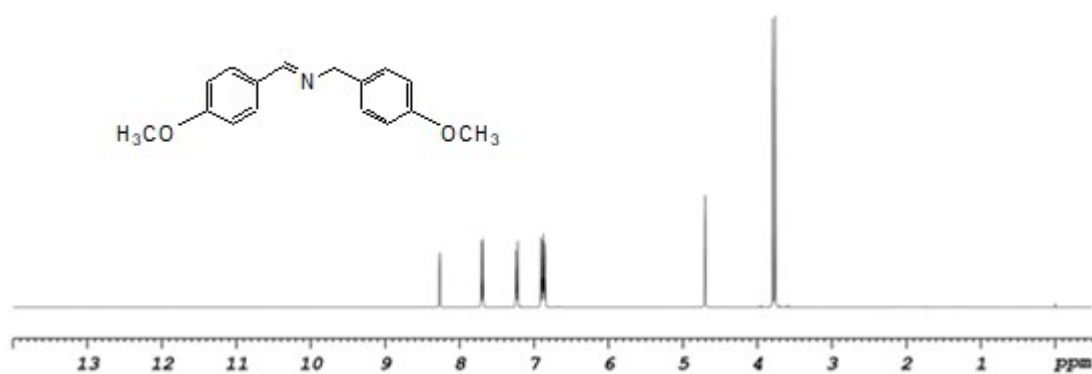

**Fig. S8:** <sup>1</sup>H NMR of N-(4-methoxybenzylidene)-p-methoxybenzylamine.

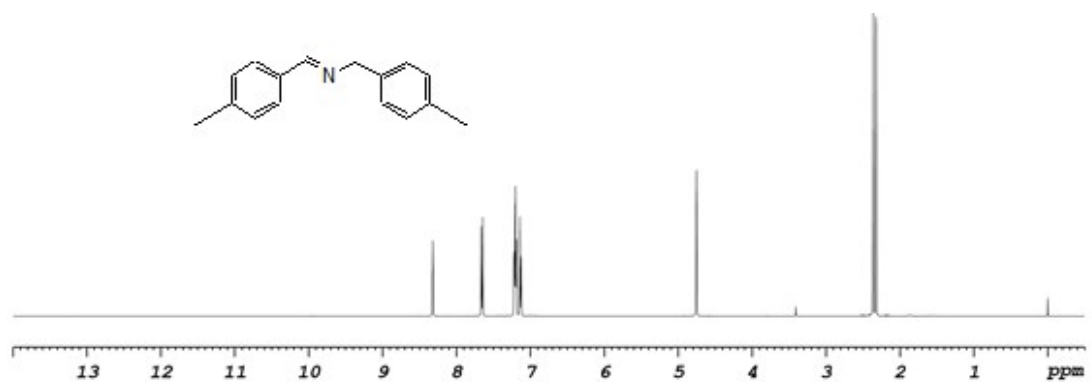

**Fig. S9:** <sup>1</sup>H NMR of N-(4-methylbenzylidene)-p-methylbenzylamine.

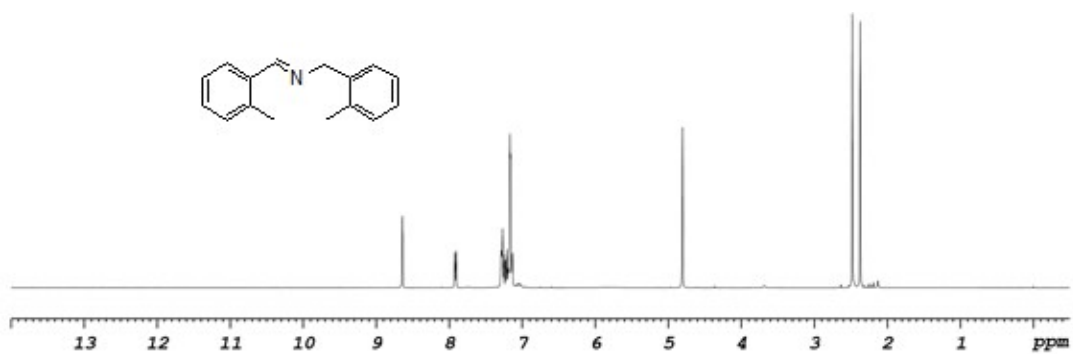

**Fig. S10:**  $^1\text{H}$  NMR of N-(2-methylbenzylidene)-o-methylbenzylamine.

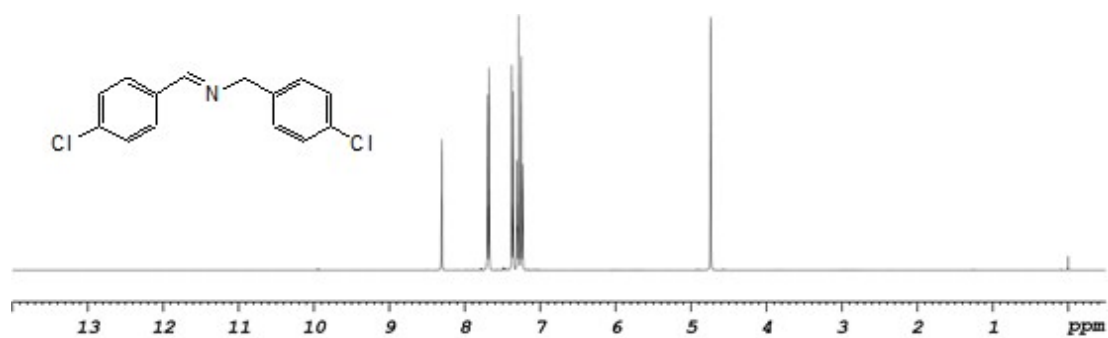

**Fig. S11:**  $^1\text{H}$  NMR of N-(4-chlorobenzylidene)-p-chlorobenzylamine.

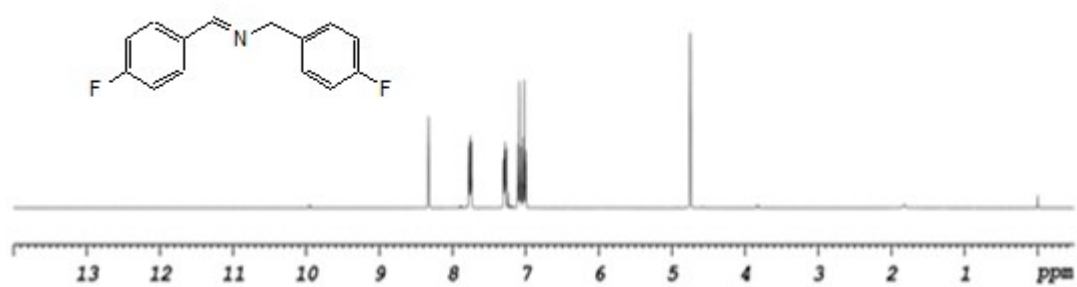

**Fig. S12:**  $^1\text{H}$  NMR of N-(4-bromobenzylidene)-p-fluorobenzylamine.

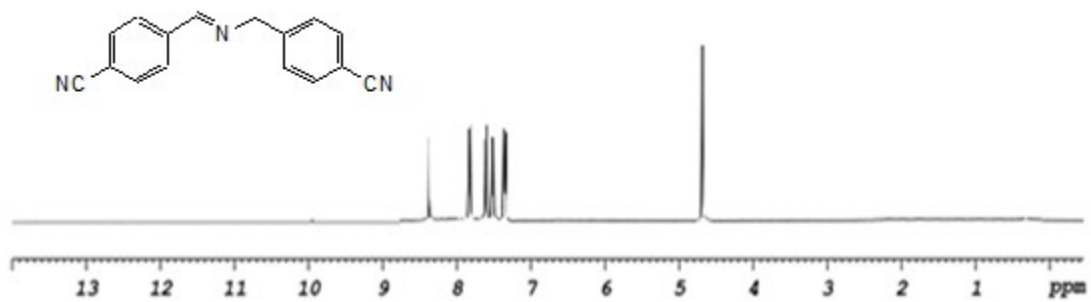

**Fig. S13:** <sup>1</sup>H NMR of N-(4-cyanobenzylidene)-p-fluorobenzylamine.



References:

- [1]. A. Kumar, A. Hamdi, Y. Coffinier, A. Addad, P. Roussel, R. Boukherroub, S. L. Jain, *J. Photochem. Photobio. A*, 2018, 356, 457-463.
- [2]. S. Naya, K. Kimura, H. Tada, *ACS Catal.*, 2012, 3, 10.
- [3]. S. Sarina, H. Y. Zhu, E. Jaatinen, Q. Xiao, H. W. Liu, J. F. Jia, C. Chen, J. Zhao, *J. Am. Chem. Soc.*, 2013, 135, 5793.
- [4]. A. Kumar, P. Kumar, C. Joshi, S. Ponnada, A. K. Pathak, A. Ali, B. Sreedhar, S. L. Jain, *Green Chem.*, 2016, 18, 2514.
- [5]. S. Samanta, S. Khilari, D. Pradhan, R. Srivastava, *ACS Sustainable Chem. Eng.*, 2017, 5, 2562.
- [6]. F. Raza, J. H. Park, H. R. Lee, H. I. Kim, S. J. Jeon, J. H. Kim, *ACS Catal.*, 2016, 6, 2754.
- [7]. N. Zhang, X. Y. Li, H. C. Ye, S. G. Chen, H. X. Ju, D. B. Liu, L. Yue, W. Ye, C. M. Wang, Q. Xu, J. F. Zhu, L. Song, J. Jiang, Y. J. Xiong, *J. Am. Chem. Soc.*, 2016, 138, 8928.
